# Supplementary material
Source: HighWire-hosted journal article supplement (https://www.cmajopen.ca/highwire/filestream/84475/field_highwire_adjunct_files/2/2020-0076-3-at.pdf)
Supplement: 2020-0076-3-at.pdf [file 2020-0076-3-at.pdf]

**Appendix 3 (as supplied by the authors): Predictive performance of combinations of variables**

|                                                                                                                                                                                                                                                                            |                                                                                                                                                                                                                                                                                           |                                                                                                                                                                                                                                                                                                           |                                                                                                                                                                   |
|----------------------------------------------------------------------------------------------------------------------------------------------------------------------------------------------------------------------------------------------------------------------------|-------------------------------------------------------------------------------------------------------------------------------------------------------------------------------------------------------------------------------------------------------------------------------------------|-----------------------------------------------------------------------------------------------------------------------------------------------------------------------------------------------------------------------------------------------------------------------------------------------------------|-------------------------------------------------------------------------------------------------------------------------------------------------------------------|
| Complete model*                                                                                                                                                                                                                                                            | Model excluding dementia, mood disorder, schizophrenia, anxiety                                                                                                                                                                                                                           | Model excluding dementia, mood disorder, schizophrenia, anxiety, other disorders, substance abuse, region, initial dose                                                                                                                                                                                   | Model excluding dementia, mood disorder, schizophrenia, anxiety, other disorders, substance abuse, region, initial dose, sex, antidepressants, concomitant opioid |
| <b>Model's AUC</b>                                                                                                                                                                                                                                                         | <b>0.8736</b>                                                                                                                                                                                                                                                                             | <b>0.8728</b>                                                                                                                                                                                                                                                                                             | <b>0.8689</b>                                                                                                                                                     |
| Model excluding dementia, mood disorder, schizophrenia, anxiety, other disorders, substance abuse, region, initial dose, sex, antidepressants, concomitant opioid, CCI, index opioid                                                                                       | Model excluding dementia, mood disorder, schizophrenia, anxiety, other disorders, substance abuse, region, initial dose, sex, antidepressants, concomitant opioid, CCI, index opioid, NSAIDs, antipsychotics                                                                              | Model excluding dementia, mood disorder, schizophrenia, anxiety, other disorders, substance abuse, region, initial dose, sex, antidepressants, concomitant opioid, CCI, index opioid, NSAIDs, antipsychotics, acetaminophen/codeine, acetaminophen                                                        |                                                                                                                                                                   |
| <b>Model's AUC</b>                                                                                                                                                                                                                                                         | <b>0.8650</b>                                                                                                                                                                                                                                                                             | <b>0.8590</b>                                                                                                                                                                                                                                                                                             | <b>0.8490</b>                                                                                                                                                     |
| Model excluding dementia, mood disorder, schizophrenia, anxiety, other disorders, substance abuse, region, initial dose, sex, antidepressants, concomitant opioid, CCI, index opioid, NSAIDs, antipsychotics, acetaminophen/codeine, acetaminophen, prescriber's specialty | Model excluding dementia, mood disorder, schizophrenia, anxiety, other disorders, substance abuse, region, initial dose, sex, antidepressants, concomitant opioid, CCI, index opioid, NSAIDs, antipsychotics, acetaminophen/codeine, acetaminophen, prescriber's specialty, gabapentinoid | Model excluding dementia, mood disorder, schizophrenia, anxiety, other disorders, substance abuse, region, initial dose, sex, antidepressants, concomitant opioid, CCI, index opioid, NSAIDs, antipsychotics, acetaminophen/codeine, acetaminophen, prescriber's specialty, gabapentinoid, mode of action |                                                                                                                                                                   |
| <b>Model's AUC</b>                                                                                                                                                                                                                                                         | <b>0.8405</b>                                                                                                                                                                                                                                                                             | <b>0.8296</b>                                                                                                                                                                                                                                                                                             | <b>0.8135</b>                                                                                                                                                     |

|                                                                                                                                                                                                                                                                                                                            |                                         |                                                            |                                                                   |
|----------------------------------------------------------------------------------------------------------------------------------------------------------------------------------------------------------------------------------------------------------------------------------------------------------------------------|-----------------------------------------|------------------------------------------------------------|-------------------------------------------------------------------|
| Model excluding dementia, mood disorder, schizophrenia, anxiety, other disorders, substance abuse, region, initial dose, sex, antidepressants, concomitant opioid, CCI, index opioid, NSAIDs, antipsychotics, acetaminophen/codeine, acetaminophen, prescriber's specialty, gabapentinoid, mode of action, benzodiazepines | Model including age and indication only | Model including age and initial prescription duration only | Model including indication and initial prescription duration only |
| <b>Model's AUC</b>                                                                                                                                                                                                                                                                                                         | <b>0.7955</b>                           | <b>0.7342</b>                                              | <b>0.7589</b>                                                     |
|                                                                                                                                                                                                                                                                                                                            |                                         |                                                            | <b>0.7618</b>                                                     |

Note: AUC = area under the curve, CCI = Charlson comorbidity index, NSAID = nonsteroidal anti-inflammatory drug.

\*Complete model includes: age, sex, CCI, patient region of residence, opioid at index date, concomitant opioid, mode of action, initial dose, initial duration, prescriber's specialty at index date, indication, mood disorder, schizophrenia, anxiety, other disorder, dementia, substance abuse, benzodiazepine, antipsychotics, antidepressants, NSAID, acetaminophen, acetaminophen/codeine, gabapentinoid.
